# Supplementary figures and images for: Transcriptional Specificity Analysis of Testis and Epididymis Tissues in Donkey
Source: MDPI journal article supplement (doi:10.3390/genes13122339), 2022-12-11

A

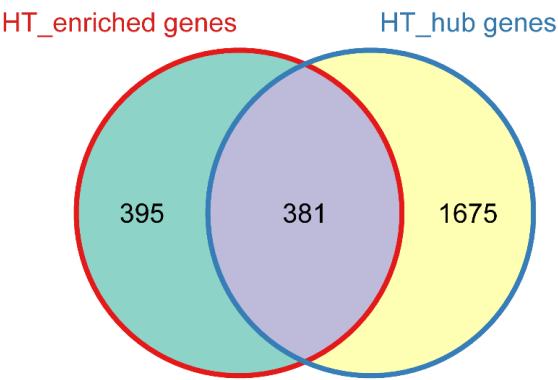

B

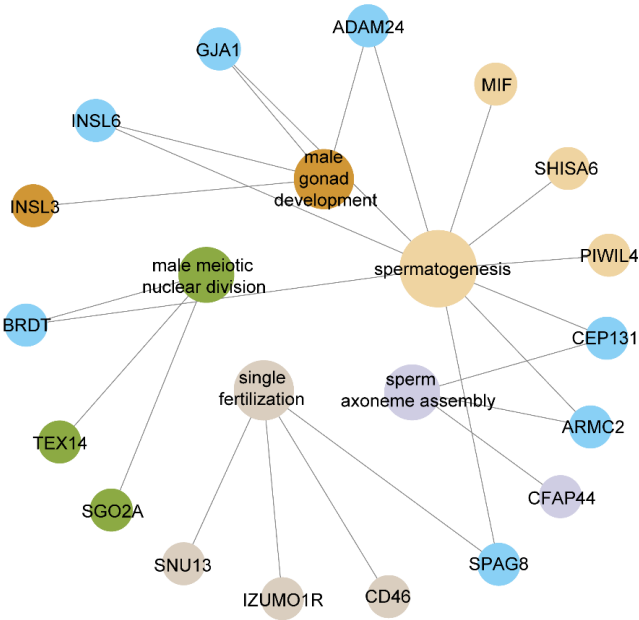

C

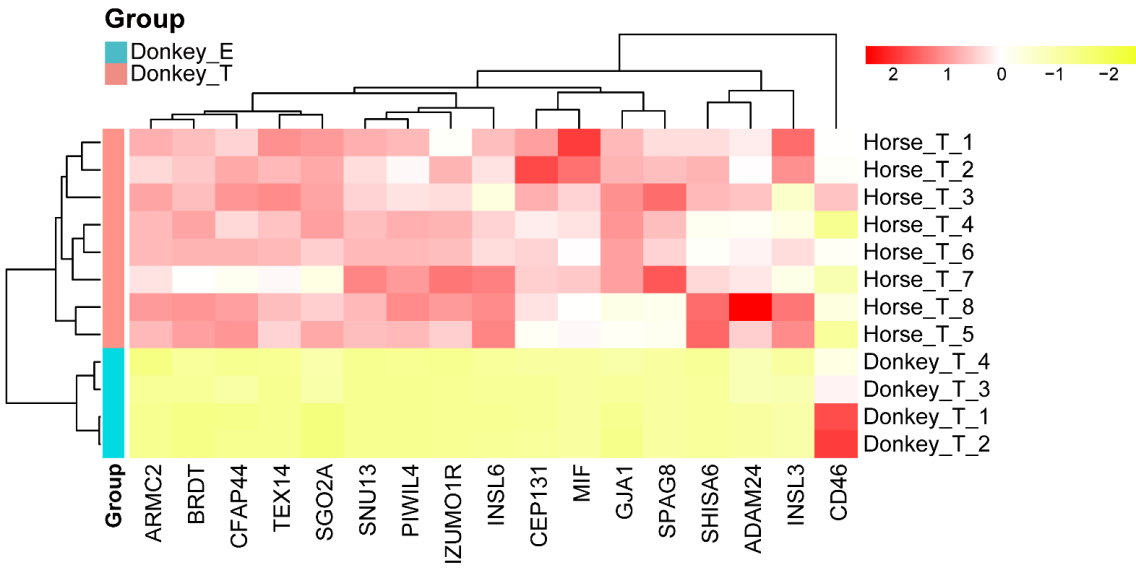

D

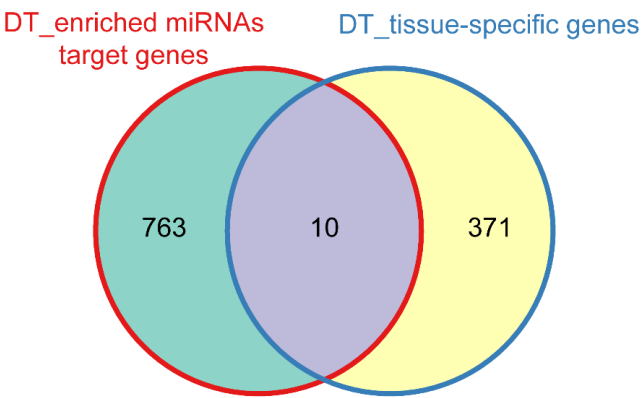

E

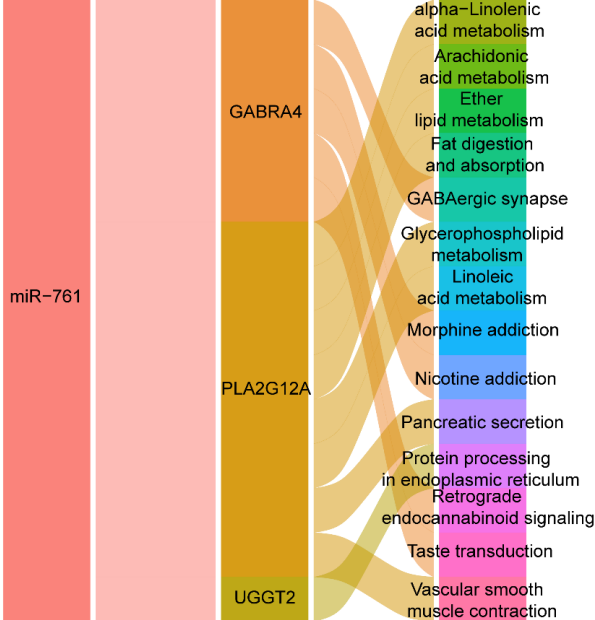

Supplement: s1 [file s1]
